# Supplementary material for: Risk Behaviours Associated with Dating and Relationship Violence among 11–16 Year Olds in Wales: Results from the 2019 Student Health and Wellbeing Survey
Source: PubMed Central journal article supplement (PMC7908341; doi:10.3390/ijerph18031192), 2021-01-29
Supplement: ijerph-18-01192-s001.pdf [file ijerph-18-01192-s001.pdf]

## 1. Single-Behaviour Logistic Regression Models

**Table 1.** Unadjusted odds ratios (95% confidence intervals) for the associations between DRV and bullying, cyberbullying, sexting, alcohol and cannabis.

| <b>Bullying Victimization</b>      |                                 |                                  |                                |
|------------------------------------|---------------------------------|----------------------------------|--------------------------------|
|                                    | <b>Boys</b><br><i>n</i> =21,968 | <b>Girls</b><br><i>n</i> =22,770 | <b>All</b><br><i>n</i> =44,738 |
| <b>Emotional Victimization</b>     |                                 |                                  |                                |
| Not been bullied                   | 1.00 (ref)                      | 1.00 (ref)                       | 1.00 (ref)                     |
| Experienced bullying               | 2.29 (2.14-2.45)***             | 2.29 (2.14-2.44)***              | 2.34 (2.23-2.45)***            |
| <b>Physical Victimization</b>      | <i>n</i> =21,998                | <i>n</i> =22,763                 | <i>n</i> =44,761               |
| Not been bullied                   | 1.00 (ref)                      | 1.00 (ref)                       | 1.00 (ref)                     |
| Experienced bullying               | 2.26 (2.10-2.44)***             | 2.64 (2.43-2.87)***              | 2.26 (2.14-2.40)***            |
| <b>Emotional Perpetration</b>      | <i>n</i> =21,965                | <i>n</i> =22,802                 | <i>n</i> =44,767               |
| Not been bullied                   | 1.00 (ref)                      | 1.00 (ref)                       | 1.00 (ref)                     |
| Experienced bullying               | 1.81 (1.68-1.95)***             | 1.67 (1.55-1.80)***              | 1.74 (1.65-1.83)***            |
| <b>Physical Perpetration</b>       | <i>n</i> =22,003                | <i>n</i> =22,825                 | <i>n</i> =44,828               |
| Not been bullied                   | 1.00 (ref)                      | 1.00 (ref)                       | 1.00 (ref)                     |
| Experienced bullying               | 2.28 (2.06-2.52)***             | 1.85 (1.69-2.03)***              | 2.04 (1.90-2.19)***            |
| <b>Bullying Perpetration</b>       |                                 |                                  |                                |
|                                    | <b>Boys</b><br><i>n</i> =21,595 | <b>Girls</b><br><i>n</i> =22,605 | <b>All</b><br><i>n</i> =44,200 |
| <b>Emotional Victimization</b>     |                                 |                                  |                                |
| Not bullied another person         | 1.00 (ref)                      | 1.00 (ref)                       | 1.00 (ref)                     |
| Bullied another person             | 2.24 (2.08-2.42)***             | 2.03 (1.87-2.20)***              | 2.03 (1.93-2.14)***            |
| <b>Physical Victimization</b>      | <i>n</i> =21,635                | <i>n</i> =22,610                 | <i>n</i> =44,245               |
| Not bullied another person         | 1.00 (ref)                      | 1.00 (ref)                       | 1.00 (ref)                     |
| Bullied another person             | 2.50 (2.31-2.70)***             | 2.66 (2.41-2.93)***              | 2.67 (2.51-2.84)***            |
| <b>Emotional Perpetration</b>      | <i>n</i> =21,595                | <i>n</i> =22,649                 | <i>n</i> =44,244               |
| Not bullied another person         | 1.00 (ref)                      | 1.00 (ref)                       | 1.00 (ref)                     |
| Bullied another person             | 2.78 (2.58-2.99)***             | 2.58 (2.37-2.80)***              | 2.63 (2.50-2.77)***            |
| <b>Physical Perpetration</b>       | <i>n</i> =21,634                | <i>n</i> =22,671                 | <i>n</i> =44,305               |
| Not bullied another person         | 1.00 (ref)                      | 1.00 (ref)                       | 1.00 (ref)                     |
| Bullied another person             | 3.37 (3.06-3.70)***             | 3.15 (2.81-2.54)***              | 3.21 (3.00-3.43)***            |
| <b>Cyberbullying Victimization</b> |                                 |                                  |                                |

|                                      | <b>Boys</b>         | <b>Girls</b>        | <b>All</b>          |
|--------------------------------------|---------------------|---------------------|---------------------|
| <b>Emotional Victimization</b>       | <i>n</i> =21,891    | <i>n</i> =22,742    | <i>n</i> =44,633    |
| Not been cyberbullied                | 1.00 (ref)          | 1.00 (ref)          | 1.00 (ref)          |
| Experienced cyberbullying            | 2.97 (2.77-3.18)*** | 2.93 (2.76-3.12)*** | 3.03 (2.89-3.18)*** |
| <b>Physical Victimization</b>        | <i>n</i> =21,929    | <i>n</i> =22,736    | <i>n</i> =44,665    |
| Not been cyberbullied                | 1.00 (ref)          | 1.00 (ref)          | 1.00 (ref)          |
| Experienced cyberbullying            | 2.86 (2.64-3.09)*** | 2.92 (2.72-3.13)*** | 2.58 (2.44-2.74)*** |
| <b>Emotional Perpetration</b>        | <i>n</i> =21,891    | <i>n</i> =22,777    | <i>n</i> =44,668    |
| Not been cyberbullied                | 1.00 (ref)          | 1.00 (ref)          | 1.00 (ref)          |
| Experienced cyberbullying            | 2.43 (2.24-2.64)*** | 2.23 (2.07-2.41)*** | 2.31 (2.18-2.44)*** |
| <b>Physical Perpetration</b>         | <i>n</i> =21,930    | <i>n</i> =22,797    | <i>n</i> =44,727    |
| Not been cyberbullied                | 1.00 (ref)          | 1.00 (ref)          | 1.00 (ref)          |
| Experienced cyberbullying            | 3.09 (2.77-3.44)*** | 2.10 (1.91-2.31)*** | 2.47 (2.29-2.67)*** |
| <b>Sexting<sup>1</sup></b>           |                     |                     |                     |
|                                      | <b>Boys</b>         | <b>Girls</b>        | <b>All</b>          |
|                                      | <i>n</i> =21,582    | <i>n</i> =22,012    | <i>n</i> =43,594    |
| <b>Emotional Victimization</b>       |                     |                     |                     |
| Never sexted and had no image shared | 1.00 (ref)          | 1.00 (ref)          | 1.00 (ref)          |
| Sexted and had no image shared       | 3.49 (3.09-3.94)*** | 3.98 (3.54-4.47)*** | 3.76 (3.45-4.09)*** |
| Never sexted and had image shared    | 2.18 (1.98-2.40)*** | 2.21 (2.04-2.39)*** | 2.22 (2.08-2.36)*** |
| Sexted and had image shared          | 4.45 (3.96-4.99)*** | 6.36 (5.76-7.02)*** | 5.38 (4.98-5.81)*** |
| <b>Physical Victimization</b>        | <i>n</i> =21,605    | <i>n</i> =22,010    | <i>n</i> =43,615    |
| Never sexted and had no image shared | 1.00 (ref)          | 1.00 (ref)          | 1.00 (ref)          |
| Sexted and had no image shared       | 2.60 (2.28-2.97)*** | 3.07 (2.64-3.57)*** | 2.70 (2.45-2.97)*** |
| Never sexted and had image shared    | 2.14 (1.94-2.35)*** | 2.37 (2.13-2.62)*** | 2.13 (1.99-2.28)*** |
| Sexted and had image shared          | 4.31 (3.82-4.87)*** | 6.28 (5.68-6.95)*** | 4.93 (4.52-5.38)*** |
| <b>Emotional Perpetration</b>        | <i>n</i> =21,572    | <i>n</i> =22,039    | <i>n</i> =43,611    |
| Never sexted and had no image shared | 1.00 (ref)          | 1.00 (ref)          | 1.00 (ref)          |
| Sexted and had no image shared       | 4.27 (3.79-4.81)*** | 4.65 (4.10-5.27)*** | 4.46 (4.10-4.85)*** |
| Never sexted and had image shared    | 2.40 (2.16-2.68)*** | 2.17 (1.96-2.41)*** | 2.27 (2.10-2.45)*** |
| Sexted and had image shared          | 5.55 (4.93-6.25)*** | 7.33 (6.63-8.09)*** | 6.43 (5.92-6.99)*** |
| <b>Physical Perpetration</b>         | <i>n</i> =21,606    | <i>n</i> =22,056    | <i>n</i> =43,662    |

|                                      |                     |                     |                     |
|--------------------------------------|---------------------|---------------------|---------------------|
| Never sexted and had no image shared | 1.00 (ref)          | 1.00 (ref)          | 1.00 (ref)          |
| Sexted and had no image shared       | 2.45 (2.03-2.97)*** | 3.33 (2.78-4.00)*** | 2.87 (2.51-3.28)*** |
| Never sexted and had image shared    | 1.99 (1.72-2.30)*** | 2.56 (2.22-2.95)*** | 2.26 (2.05-2.48)*** |
| Sexted and had image shared          | 4.57 (3.98-5.23)*** | 6.85 (5.99-7.85)*** | 5.63 (5.10-6.21)*** |

### Alcohol

|                                | Boys<br><i>n</i> =22,216 | Girls<br><i>n</i> =22,744 | All<br><i>n</i> =44,960 |
|--------------------------------|--------------------------|---------------------------|-------------------------|
| <b>Emotional Victimization</b> |                          |                           |                         |
| <1 alcoholic drinks            | 1.00 (ref)               | 1.00 (ref)                | 1.00 (ref)              |
| 1-4 alcoholic drinks           | 1.76 (1.63-1.91)***      | 2.24 (2.11-2.38)***       | 2.02 (1.92-2.13)***     |
| 5+ alcoholic drinks            | 2.84 (2.56-3.15)***      | 3.94 (3.60-4.30)***       | 3.45 (3.23-3.70)***     |
| <b>Physical Victimization</b>  | <i>n</i> =22,254         | <i>n</i> =22,738          | <i>n</i> =44,992        |
| <1 alcoholic drinks            | 1.00 (ref)               | 1.00 (ref)                | 1.00 (ref)              |
| 1-4 alcoholic drinks           | 1.47 (1.36-1.59)***      | 1.75 (1.61-1.89)***       | 1.54 (1.45-1.64)***     |
| 5+ alcoholic drinks            | 2.39 (2.13-2.68)***      | 3.35 (3.03-3.72)***       | 2.67 (2.44-2.93)***     |
| <b>Emotional Perpetration</b>  | <i>n</i> =22,207         | <i>n</i> =22,782          | <i>n</i> =44,989        |
| <1 alcoholic drinks            | 1.00 (ref)               | 1.00 (ref)                | 1.00 (ref)              |
| 1-4 alcoholic drinks           | 1.87 (1.71-2.04)***      | 2.59 (2.41-2.79)***       | 2.21 (2.08-2.35)***     |
| 5+ alcoholic drinks            | 3.21 (2.89-3.56)***      | 4.90 (4.47-5.36)***       | 4.02 (3.75-4.31)***     |
| <b>Physical Perpetration</b>   | <i>n</i> =22,253         | <i>n</i> =22,801          | <i>n</i> =45,054        |
| <1 alcoholic drinks            | 1.00 (ref)               | 1.00 (ref)                | 1.00 (ref)              |
| 1-4 alcoholic drinks           | 1.36 (1.21-1.52)***      | 1.99 (1.78-2.23)***       | 1.64 (1.51-1.77)***     |
| 5+ alcoholic drinks            | 2.29 (2.00-2.62)***      | 4.13 (3.69-4.63)***       | 3.13 (2.85-3.44)***     |

### Cannabis

|                                | Boys<br><i>n</i> =22,402 | Girls<br><i>n</i> =23,240 | All<br><i>n</i> =45,642 |
|--------------------------------|--------------------------|---------------------------|-------------------------|
| <b>Emotional Victimization</b> |                          |                           |                         |
| Never tried cannabis           | 1.00 (ref)               | 1.00 (ref)                | 1.00 (ref)              |
| Tried cannabis                 | 2.86 (2.63-3.11)***      | 3.72 (3.40-4.06)***       | 3.22 (3.03-3.43)***     |
| <b>Physical Victimization</b>  | <i>n</i> =22,441         | <i>n</i> =23,245          | <i>n</i> =45,686        |
| Never tried cannabis           | 1.00 (ref)               | 1.00 (ref)                | 1.00 (ref)              |
| Tried cannabis                 | 2.35 (2.14-2.57)***      | 3.30 (3.02-3.61)***       | 2.73 (2.54-2.93)***     |
| <b>Emotional Perpetration</b>  | <i>n</i> =22,394         | <i>n</i> =23,279          | <i>n</i> =45,673        |
| Never tried cannabis           | 1.00 (ref)               | 1.00 (ref)                | 1.00 (ref)              |

|                              |                     |                     |                     |
|------------------------------|---------------------|---------------------|---------------------|
| Tried cannabis               | 3.54 (3.26-3.84)*** | 4.56 (4.16-4.99)*** | 4.01 (3.75-4.29)*** |
| <b>Physical Perpetration</b> | <i>n</i> =22,443    | <i>n</i> =23,305    | <i>n</i> =45,748    |
| Never tried cannabis         | 1.00 (ref)          | 1.00 (ref)          | 1.00 (ref)          |
| Tried cannabis               | 2.46 (2.16-2.80)*** | 3.86 (3.48-4.28)*** | 3.11 (2.87-3.38)*** |

<sup>1</sup>Sexting includes measures for 'ever having sexted' and 'ever having a sexually explicit image shared without consent'.

\* $p < 0.05$ ; \*\* $p < 0.01$ , \*\*\* $p < 0.001$

## 2. Multi-Behaviour Logistic Regression Models

**Table 2.** Adjusted odds ratios (95% confidence intervals) for the associations between DRV and bullying, cyberbullying, sexting, alcohol and cannabis<sup>1</sup>.

|                                      | Emotional Victimisation<br>Boys and girls (n=36,412) | Physical Victimisation<br>Boys and girls (n=36,430) | Emotional Perpetration<br>Boys and girls (n=36,428) | Physical Perpetration<br>Boys and girls (n=36,454) |
|--------------------------------------|------------------------------------------------------|-----------------------------------------------------|-----------------------------------------------------|----------------------------------------------------|
| <b>Bullying Victimisation</b>        |                                                      |                                                     |                                                     |                                                    |
| Not been bullied                     | 1.00 (ref)                                           | 1.00 (ref)                                          | 1.00 (ref)                                          | 1.00 (ref)                                         |
| Experienced bullying                 | 1.81 (1.71-1.91)***                                  | 1.59 (1.47-1.72)***                                 | 1.25 (1.16-1.34)***                                 | 1.29 (1.17-1.43)***                                |
| <b>Bullying Perpetration</b>         |                                                      |                                                     |                                                     |                                                    |
| Not bullied another person           | 1.00 (ref)                                           | 1.00 (ref)                                          | 1.00 (ref)                                          | 1.00 (ref)                                         |
| Bullied another person               | 1.30 (1.21-1.40)***                                  | 1.70 (1.57-1.86)***                                 | 1.94 (1.81-2.08)***                                 | 2.02 (1.83-2.23)***                                |
| <b>Cyberbullying Victimisation</b>   |                                                      |                                                     |                                                     |                                                    |
| Not been cyberbullied                | 1.00 (ref)                                           | 1.00 (ref)                                          | 1.00 (ref)                                          | 1.00 (ref)                                         |
| Experienced cyberbullying            | 2.01 (1.90-2.13)***                                  | 1.60 (1.47-1.74)***                                 | 1.62 (1.51-1.74)***                                 | 1.54 (1.37-1.73)***                                |
| <b>Sexting<sup>2</sup></b>           |                                                      |                                                     |                                                     |                                                    |
| Never sexted and had no image shared | 1.00 (ref)                                           | 1.00 (ref)                                          | 1.00 (ref)                                          | 1.00 (ref)                                         |
| Sexted and had no image shared       | 2.36 (2.13-2.61)***                                  | 2.02 (1.79-2.27)***                                 | 2.62 (2.39-2.88)***                                 | 2.16 (1.85-2.53)***                                |
| Never sexted and had image shared    | 1.70 (1.58-1.83)***                                  | 1.78 (1.63-1.94)***                                 | 1.72 (1.56-1.89)***                                 | 1.91 (1.69-2.14)***                                |
| Sexted and had image shared          | 2.97 (2.70-3.27)***                                  | 3.04 (2.71-3.41)***                                 | 3.25 (2.93-3.61)***                                 | 3.21 (2.77-3.72)***                                |
| <b>Alcohol</b>                       |                                                      |                                                     |                                                     |                                                    |
| <1 alcoholic drinks                  | 1.00 (ref)                                           | 1.00 (ref)                                          | 1.00 (ref)                                          | 1.00 (ref)                                         |
| 1-4 alcoholic drinks                 | 1.43 (1.34-1.53)***                                  | 1.43 (1.32-1.55)***                                 | 1.41 (1.31-1.52)***                                 | 1.41 (1.26-1.57)***                                |
| 5+ alcoholic drinks                  | 1.67 (1.52-1.83)***                                  | 1.78 (1.59-2.00)***                                 | 1.61 (1.46-1.77)***                                 | 1.87 (1.63-2.14)***                                |
| <b>Cannabis</b>                      |                                                      |                                                     |                                                     |                                                    |
| Never tried cannabis                 | 1.00 (ref)                                           | 1.00 (ref)                                          | 1.00 (ref)                                          | 1.00 (ref)                                         |
| Tried cannabis                       | 1.46 (1.35-1.59)***                                  | 1.42 (1.30-1.56)***                                 | 1.62 (1.47-1.78)***                                 | 1.41 (1.24-1.60)***                                |

<sup>1</sup>Multipredictor models controlled for socio-demographics which have previously been associated with DRV [9], including year group, FAS, ethnicity and family structure.

<sup>2</sup>Sexting includes measures for 'ever having sexted' and 'ever having a sexually explicit image shared without consent'.

\* $p < 0.05$ ; \*\* $p < 0.01$ , \*\*\* $p < 0.001$
